# Supplementary material
Source: HighWire-hosted journal article supplement (https://www.ajnr.org/highwire/filestream/52058/field_highwire_adjunct_files/0/1918_appendix.pdf)
Supplement: 1918_appendix.pdf [file 1918_appendix.pdf]

## Appendix

In consideration of the materials, sizes, and shapes associated with the aneurysm clips (Codman Slim-Line Aneurysm Clip, straight, blade length 25-mm; Codman Slim-Line Aneurysm Clip Graft, 5-mm diameter × 5-mm width; Codman Slim-Line Aneurysm Clip, reinforcing 30° angle, 6-mm × 18-mm) that underwent MR imaging testing for magnetic field interactions, MR imaging-related heating, and artifacts at 3T, the findings from this investigation pertain to those listed, as follows:

### Aneurysm Clips

| Codman Slim-Line Aneurysm Clip Part # and configuration | Blade Length (mm) |
|---------------------------------------------------------|-------------------|
| <b>Straight</b>                                         |                   |
| 20-1600                                                 | 5                 |
| 20-1601                                                 | 7                 |
| 20-1602                                                 | 9                 |
| 20-1603                                                 | 12                |
| 20-1604                                                 | 15                |
| 20-1605                                                 | 20                |
| <b>20-1606</b>                                          | <b>25</b>         |
| <b>Slightly Curved</b>                                  |                   |
| 20-1610                                                 | 8                 |
| 20-1611                                                 | 10                |
| 20-1612                                                 | 12                |
| 20-1613                                                 | 14                |
| 20-1614                                                 | 16                |
| 20-1615                                                 | 20                |
| <b>Curved</b>                                           |                   |
| 20-1620                                                 | 7.5               |
| 20-1621                                                 | 9.5               |
| 20-1622                                                 | 11.5              |
| <b>Right Angle</b>                                      |                   |
| 20-1626                                                 | 5                 |
| 20-1627                                                 | 7.5               |
| 20-1628                                                 | 10                |
| 20-1629                                                 | 15                |
| <b>Sharp Right Angle</b>                                |                   |
| 20-1682                                                 | 6                 |
| 20-1683                                                 | 9                 |
| 20-1684                                                 | 12                |
| <b>30° Forward Curve</b>                                |                   |
| 20-1635                                                 | 8                 |
| 20-1636                                                 | 12                |
| 20-1637                                                 | 16                |
| <b>Sideward Angle</b>                                   |                   |
| 20-1641                                                 | 7                 |
| 20-1642                                                 | 9                 |
| 20-1643                                                 | 12                |
| 20-1644                                                 | 15                |
| <b>30° Forward Angle</b>                                |                   |
| 20-1648                                                 | 7                 |
| 20-1649                                                 | 9                 |
| 20-1650                                                 | 12                |
| 20-1651                                                 | 15                |
| <b>Bayonet (Straight)</b>                               |                   |
| 20-1655                                                 | 5                 |
| 20-1656                                                 | 7                 |
| 20-1657                                                 | 9                 |
| 20-1658                                                 | 12                |
| 12-1659                                                 | 15                |
| 20-1660                                                 | 20                |
| 20-1661                                                 | 25                |

### Aneurysm Clips

|                                                                 |         |
|-----------------------------------------------------------------|---------|
| <b>Super Bayonet</b>                                            |         |
| 20-1675                                                         | 5       |
| 20-1676                                                         | 7       |
| 20-1677                                                         | 9       |
| 20-1678                                                         | 12      |
| 20-1679                                                         | 15      |
| 20-1680                                                         | 20      |
| 20-1681                                                         | 25      |
| <b>Bayonet (30° Curved Forward-Right)</b>                       |         |
| 20-1665                                                         | 7       |
| 20-1666                                                         | 9       |
| <b>Bayonet (30° Curved Forward-Left)</b>                        |         |
| 20-1670                                                         | 7       |
| 20-1671                                                         | 9       |
| <b>Fenestrated Straight, 4-mm Opening</b>                       |         |
| 20-1721                                                         | 6       |
| 20-1722                                                         | 9       |
| 20-1723                                                         | 12      |
| 20-1724                                                         | 16      |
| 20-1725                                                         | 20      |
| 10-1726                                                         | 24      |
| <b>Fenestrated 45° Angle, 4-mm Opening (30°)</b>                |         |
| 20-1727                                                         | 6       |
| 20-1728                                                         | 9       |
| 20-1729                                                         | 12      |
| 20-1730                                                         | 16      |
| 20-1731                                                         | 20      |
| 20-1732                                                         | 25      |
| <b>Fenestrated 90° Angle, 4-mm Opening</b>                      |         |
| 20-1718                                                         | 6       |
| 20-1719                                                         | 9       |
| 20-1720                                                         | 12      |
| <b>Fenestrated Straight, 6-mm Opening</b>                       |         |
| 20-1685                                                         | 6       |
| 20-1686                                                         | 9       |
| 20-1687                                                         | 12      |
| 20-1689                                                         | 20      |
| 20-1690                                                         | 24      |
| <b>Fenestrated 45° Angle, 6-mm Opening</b>                      |         |
| 20-1691                                                         | 6       |
| 20-1692                                                         | 9       |
| 20-1693                                                         | 12      |
| 20-1694                                                         | 16      |
| 20-1695                                                         | 20      |
| 20-1696                                                         | 24      |
| <b>Fenestrated 90° Angle, 6-mm Opening</b>                      |         |
| 20-1697                                                         | 6       |
| 20-1698                                                         | 9       |
| 20-1699                                                         | 12      |
| <b>Fenestrated Bayonet Straight, 6-mm Opening</b>               |         |
| 20-1733                                                         | 6       |
| 20-1734                                                         | 9       |
| 20-1735                                                         | 12      |
| 20-1736                                                         | 15      |
| <b>Fenestrated Straight, 3-mm Extended Tandem, 6-mm Opening</b> |         |
| 20-1700                                                         | 6       |
| 20-1701                                                         | 9       |
| 20-1702                                                         | 12      |
| <b>Fenestrated Straight, 5-mm Extended Tandem, 6-mm Opening</b> |         |
| 20-1703                                                         | 6       |
| 20-1704                                                         | 9       |
| 20-1705                                                         | 12      |
| <b>Graft, 4-mm Diameter</b>                                     |         |
| 20-1715                                                         | 3 width |

| <b>Aneurysm Clips</b>                           |                          |
|-------------------------------------------------|--------------------------|
| 20-1716                                         | 5 width                  |
| 20-1717                                         | 7 width                  |
| Reinforcing Zero° Angle, 6-mm Wide              |                          |
| 20-1740                                         | 6                        |
| 20-1741                                         | 12                       |
| 20-1742                                         | 18                       |
| Reinforcing 30° Angle, 6-mm Wide                |                          |
| 20-1745                                         | 6                        |
| 20-1746                                         | 12                       |
| <b>20-1747</b>                                  | <b>18</b>                |
| Reinforcing 60° Angle, 6-mm Wide                |                          |
| 20-1750                                         | 6                        |
| 20-1751                                         | 12                       |
| 20-1752                                         | 18                       |
| Codman AVM Micro Clip                           | Blade Length (mm)        |
| 20-1801                                         | 1                        |
| 20-1802                                         | 1.5                      |
| 20-1803                                         | 2                        |
| 20-1804                                         | 3                        |
| 20-1805                                         | 4                        |
| Codman Slim-Line Aneurysm Clip Graft            | Encircling Diameter (mm) |
| 20-1760                                         | 2                        |
| 20-1761                                         | 2                        |
| 20-1762                                         | 2.5                      |
| 20-1763                                         | 2.5                      |
| 20-1764                                         | 2.5                      |
| 20-1765                                         | 3                        |
| 20-1766                                         | 3                        |
| 20-1767                                         | 3                        |
| 20-1768                                         | 3.5                      |
| 20-1769                                         | 3.5                      |
| 20-1770                                         | 3.5                      |
| 20-1715                                         | 4                        |
| 20-1716                                         | 4                        |
| 20-1717                                         | 4                        |
| 20-1771                                         | 5                        |
| <b>20-1772</b>                                  | <b>5</b>                 |
| 20-1773                                         | 5                        |
| Codman Slim-Line Mini Aneurysm Clip             | Blade Length (mm)        |
| 20-1821                                         | 7                        |
| 20-1822                                         | 7                        |
| 20-1823                                         | 6                        |
| 20-1824                                         | 6                        |
| 20-1825                                         | 6                        |
| 20-1826                                         | 4.5                      |
| 20-1827                                         | 4.5                      |
| 20-1828                                         | 5                        |
| 20-1829                                         | 5                        |
| 20-1831                                         | 9                        |
| 20-1832                                         | 10                       |
| 20-1833                                         | 6                        |
| 20-1834                                         | 5.5                      |
| 20-1835                                         | 8.5                      |
| 20-1836                                         | 10                       |
| 20-1837                                         | 9.5                      |
| 20-1838                                         | 4                        |
| 20-1839                                         | 9.5                      |
| Codman Slim-Line Temporary Vessel Aneurysm Clip | Blade Length (mm)        |
| 20-1860                                         | 6                        |
| 20-1861                                         | 6                        |
| 20-1862                                         | 5                        |
| 20-1863                                         | 9                        |
| 20-1864                                         | 10                       |
| 20-1865                                         | 6                        |

| <b>Aneurysm Clips</b> |     |
|-----------------------|-----|
| 20-1866               | 5.5 |
| 20-1867               | 10  |
| 20-1868               | 15  |
| 20-1869               | 15  |
| 20-1870               | 7   |
| 20-1871               | 9.5 |
| 20-1872               | 6   |
| 20-1873               | 9.5 |
| 20-1874               | 7   |

**Note:**—Bold indicates the aneurysm clip that underwent MR imaging testing.
